# Supplementary material for: Knowledge on the transmission, prevention and treatment of malaria among two endemic populations of Bangladesh and their health-seeking behaviour
Source: PubMed Central journal article supplement (PMC2729311; doi:10.1186/1475-2875-8-173), 2009-07-29
Supplement: 1475-2875-8-173-S1.pdf [file 1475-2875-8-173-S1.pdf]

# Malaria Baseline Survey 2007 Questionnaire

## Section: I

Household ID No

### A. Identification:

|       |                                                                           |                                                                                                                                                                                                                                                                                                                                                                                                                                                                                                                                                                                        |
|-------|---------------------------------------------------------------------------|----------------------------------------------------------------------------------------------------------------------------------------------------------------------------------------------------------------------------------------------------------------------------------------------------------------------------------------------------------------------------------------------------------------------------------------------------------------------------------------------------------------------------------------------------------------------------------------|
| Id 1. | 1= Non NGO member, 2= BRAC member.<br>3= Others NGO member, 4= Ultra-poor | If necessary please see card/pass book for confirmation                                                                                                                                                                                                                                                                                                                                                                                                                                                                                                                                |
| Id 2. | Households location                                                       |                                                                                                                                                                                                                                                                                                                                                                                                                                                                                                                                                                                        |
| Id 3. | Mauza name (code)                                                         |                                                                                                                                                                                                                                                                                                                                                                                                                                                                                                                                                                                        |
| Id 4. | Union/Pauroshava name                                                     |                                                                                                                                                                                                                                                                                                                                                                                                                                                                                                                                                                                        |
| Id 5. | Upazila name (code)                                                       |                                                                                                                                                                                                                                                                                                                                                                                                                                                                                                                                                                                        |
| Id 6. | District name (code)                                                      |                                                                                                                                                                                                                                                                                                                                                                                                                                                                                                                                                                                        |
| Id 7. | Respondent* name                                                          |                                                                                                                                                                                                                                                                                                                                                                                                                                                                                                                                                                                        |
| Id 8. | Data collector's name                                                     |                                                                                                                                                                                                                                                                                                                                                                                                                                                                                                                                                                                        |
| Id 9. | Date:                                                                     | <input style="width: 20px; height: 20px; border: 1px solid black;" type="text"/> <input style="width: 20px; height: 20px; border: 1px solid black;" type="text"/> <input style="width: 20px; height: 20px; border: 1px solid black;" type="text"/> <input style="width: 20px; height: 20px; border: 1px solid black;" type="text"/> <input style="width: 20px; height: 20px; border: 1px solid black;" type="text"/> <input style="width: 20px; height: 20px; border: 1px solid black;" type="text"/> <input style="width: 20px; height: 20px; border: 1px solid black;" type="text"/> |

**This questionnaire has been checked properly and no anomaly was observed-**

**Signature of the supervisor: .....**      **Date: .....**

\* Respondent: Household head/ husband or wife of the household head/ person who knows better about that household

.....

Instruction:

1. Every information obtained form the household should be written in English in this surveillance form. No block of this questionnaire could remain empty.
2. We should obtain present status of the household that you assigned. What will be happening in the future is not the part of this survey.

## HOUSEHOLD COMPOSITION

### B. Information on Household Members

| Sl No |   | Relation with the household head | Sex<br>M =1<br>Fe =2 | Age (Year/Month) |       | Marital status | Education | Type educational institute | Main occupation | Physical disable | Feeling sick within last 15 days |
|-------|---|----------------------------------|----------------------|------------------|-------|----------------|-----------|----------------------------|-----------------|------------------|----------------------------------|
|       |   |                                  |                      | Year             | Month |                |           |                            |                 |                  |                                  |
| 1     | 2 | 3                                | 4                    | 5                | 6     | 7              | 8         | 9                          | 10              | 11               | 12                               |
| 01    |   | 1= household head                |                      |                  |       |                |           |                            |                 |                  |                                  |
| 02    |   |                                  |                      |                  |       |                |           |                            |                 |                  |                                  |
| 03    |   |                                  |                      |                  |       |                |           |                            |                 |                  |                                  |
| 04    |   |                                  |                      |                  |       |                |           |                            |                 |                  |                                  |
| 05    |   |                                  |                      |                  |       |                |           |                            |                 |                  |                                  |
| 06    |   |                                  |                      |                  |       |                |           |                            |                 |                  |                                  |
| 07    |   |                                  |                      |                  |       |                |           |                            |                 |                  |                                  |
| 08    |   |                                  |                      |                  |       |                |           |                            |                 |                  |                                  |
| 09    |   |                                  |                      |                  |       |                |           |                            |                 |                  |                                  |
| 10    |   |                                  |                      |                  |       |                |           |                            |                 |                  |                                  |
| 11    |   |                                  |                      |                  |       |                |           |                            |                 |                  |                                  |

#### 3. Relation with the household head

2= Husband/Wife  
3= Son/Daughter  
4= Father/Mother  
5= Brother/Sister  
6= Daughter in law  
7= Grandson/Granddaughter  
8= Servant  
99= Other (specify)

#### 7. Marital status

1=Unmarried  
2=Married  
3=Widower/Widow  
4= Separated  
5= Divorced  
88= Not applicable

#### 8. Educational status

00=No formal education  
01, 02, ..=Class passed  
22=Non graded class  
88= Not applicable

#### 9. Type of educational institute

01=Govt. primary  
02= Private primary  
03=NGO primary  
04=Community/ Satellite  
05=Ebtedia Madrasha  
06= Dakhil Madrasha  
07=Alim/Fazil/ Kamil Madrasha  
08= Hafizia/Kaumi/ Kharizi Madrasha  
09=Kinder Gertain  
10= Lowe secondary  
11= Private secondary  
12=Govt. secondary  
13=School/college  
14= College/University  
77=Don't know  
88= Not applicable  
99= Other (specify)

#### 10. Occupation

01=Farmer (own)  
02=Farmer (Barga)  
03=Daily labour  
04=Service  
05=Business  
06= Rikswa/Van/Boat Pooler  
07=Carpenter/Mason  
08= Bus/Tempo/Scooter driver/helper  
09= Hotel/Restaurant worker  
10=Small business  
11= Beggar  
12= Working on other's house for food  
13=House work  
14= Student  
15=Unemployed  
88= Disable/Not applicable  
99= Other (specify)

#### 11. Physical disable 12. Sickness

1=Blind  
2= Deaf  
3= Can't talk  
4= Can't walk  
5= Can't move hand  
6=Physically not impaired  
99=Other (specify)  
0=No  
1=Yes (please fill up the Health Seeking Behaviour Form)

### C. Malaria awareness

|     | Question                                                            | Code                                                                                                                                       | Remarks |
|-----|---------------------------------------------------------------------|--------------------------------------------------------------------------------------------------------------------------------------------|---------|
| 1.  | Have you heard about malaria?                                       | 1= Yes; 2= No                                                                                                                              |         |
| 2.  | Why some one gets malaria?                                          | 1=Mosquito bites; 2=Fly/insect bites;<br>3=Lack of cleanliness; 4=others<br>(specify)                                                      |         |
| 3.  | How do you know that you have got malaria?<br>(Symptoms of malaria) | 1=Fever with rigor; 2= intermittent<br>fever; 3= Fever with sweating; 4=others<br>(specify)                                                |         |
| 4.  | How malaria is transmitted from one to another?                     | 1= Bitten by any mosquito; 2= Bitten by<br>a mosquito which fed by a malaria<br>patient; 3=others (specify)                                |         |
| 5.  | How malaria could be prevented?                                     | 1=Limiting mosquito's breeding places;<br>2= Bed net; 3= Mosquito coil/ointment;<br>4= ITN; 5= others (specify)                            |         |
| 6.  | How would you treat if you get malaria?                             | 1= Allopathic; 2=Kabiraji/ unani;<br>3=Spiritual; 4=Homeopathic; 5= others<br>(specify)                                                    |         |
| 7.  | Where you can get this treatment?                                   | 1= Govt Hospital; 2= Private health<br>center; 3=Village doctor; 4=Drug seller;<br>5= others (specify)                                     |         |
| 8.  | How did you obtain this information?                                | 1= Govt health worker; 2=Non-Govt<br>health worker; 3=Radio; 4=Newspaper;<br>5=Television; 6=Poster, leaflets etc ;<br>7= others (specify) |         |
| 9.  | Is there any BRAC Shastho Sebika (SS) in your<br>area?              | 1= Yes; 2= No                                                                                                                              |         |
| 10. | If present, did she provide any malaria treatment?                  | 1= Yes; 2= No                                                                                                                              |         |
| 11. | Whom are the others providing malaria treatment<br>in your area?    |                                                                                                                                            |         |

**D: HEALTH SEEKING BEHAVIOUR FORM FOR HOUSEHOLD MEMBERS WITH MALARIA**

Only for those who got code 1 in the column 12 at Household Composition Form

| Id no | Name of the sick person | Symptoms (by the sick person or his relatives) | What measure was taken while sick (treatment that was taken first)                                                                                                                                                                                                                                                              | If treatment received then how many days later? (nos. 4 to 10 in col. 4)                                              | Treatment cost for last 15 days |                    |                          | How many days was sick (from the beginning till to the end)       | Due to illness was any loss of daily wages ? (only for the person aged more than 6 years) | If the answer is for column 8 then how many days? |
|-------|-------------------------|------------------------------------------------|---------------------------------------------------------------------------------------------------------------------------------------------------------------------------------------------------------------------------------------------------------------------------------------------------------------------------------|-----------------------------------------------------------------------------------------------------------------------|---------------------------------|--------------------|--------------------------|-------------------------------------------------------------------|-------------------------------------------------------------------------------------------|---------------------------------------------------|
| 1     | 2                       | 3                                              | 4                                                                                                                                                                                                                                                                                                                               | 5                                                                                                                     | 6                               |                    |                          | 7                                                                 | 8                                                                                         | 9                                                 |
|       |                         |                                                |                                                                                                                                                                                                                                                                                                                                 |                                                                                                                       |                                 |                    |                          |                                                                   |                                                                                           |                                                   |
|       |                         |                                                |                                                                                                                                                                                                                                                                                                                                 |                                                                                                                       |                                 |                    |                          |                                                                   |                                                                                           |                                                   |
|       |                         |                                                |                                                                                                                                                                                                                                                                                                                                 |                                                                                                                       |                                 |                    |                          |                                                                   |                                                                                           |                                                   |
|       |                         |                                                |                                                                                                                                                                                                                                                                                                                                 |                                                                                                                       |                                 |                    |                          |                                                                   |                                                                                           |                                                   |
|       |                         |                                                | No measure was taken [0]<br>Home made traditional medicine/OTC was taken [1]<br>Village doctor [2]<br>Paramedics (MA/FWV/SS/CHW/HA/FWA) [3]<br>Drug seller (when diagnosed and given allopathic drugs) [4]<br>Qualified Govt/private MBBS doctor [5]<br>Kabirag/Hekim [6]<br>Spiritual [7]<br>Homeopathic [8]<br>Others specify | 1=Within 24 hours<br>2=Within 72 hours<br>3= After 3-7 days<br>4=After 1 week<br>5=Not taken to HCP<br>99= Still sick | Visit (in Taka)                 | Medicine (in Taka) | Transport cost (in Taka) | 1= 3 days<br>2= 4-7 days<br>3= More than 1 week<br>99= Still sick | 1= Yes<br>2= No<br>99= Still sick                                                         | 99= Still sick                                    |

\* Health Care provider (HCP): Nos. 2 –8 in column 4

## Section: II

### Socio-economic status:

#### A. Description of household owned land holdings

| Description                 | Own land<br>Own<br>cultivated | Own land<br>Cultivated<br>by Others | Own land<br>Uncultivated<br>(Abundant) | House on<br>own land | Pond portion | Total |
|-----------------------------|-------------------------------|-------------------------------------|----------------------------------------|----------------------|--------------|-------|
| Amount of<br>land (decimal) |                               |                                     |                                        |                      |              |       |

Note: During data collection if any one occupying land of his father then the amount of land that he is occupying should be considered his own property. If any one cultivated his own mortgaged land then give a note to the field 'Own land Own cultivated'.

#### B. Household Assets:

Do you have following things in your household?

(use appropriate code for every answer for every question)

| Property       | Code* | Property         | Code* | Property             | Code* | Property        | Code* | Property      | Code* |
|----------------|-------|------------------|-------|----------------------|-------|-----------------|-------|---------------|-------|
| Electricity    |       | Bed net          |       | Motor cycle          |       | Power tiller    |       | Dheki         |       |
| Radio          |       | Rice mill        |       | Crushing mill        |       | Shallow machine |       | Cattle        |       |
| Television     |       | Riksha/Van       |       | Lep/<br>Mattress     |       | Clock           |       | Goat          |       |
| Khat<br>/Choki |       | Bi-cycle         |       | Chair/Table          |       | Almirah         |       | Fish hatchery |       |
| Net            |       | Duck/Chicken     |       | Variety store (mudi) |       | Reserved shari  |       | Boat          |       |
| Mobile         |       | Others (specify) |       |                      |       |                 |       |               |       |

\* 1= Yes, 2=No, 3= Shared with Others

#### C. Status of the living room

| Main (largest, well) living room * | Roof                                                                              | Partition                                                                                      | Floor                                                                      | Comment                                                                                                        |
|------------------------------------|-----------------------------------------------------------------------------------|------------------------------------------------------------------------------------------------|----------------------------------------------------------------------------|----------------------------------------------------------------------------------------------------------------|
|                                    | 1= straw/ thatch<br>2= Tin<br>3= Concrete/Cement<br>99= Others (specify)<br>..... | 1= Jut stick/bamboo<br>2= Tin<br>3= Concrete/Cement<br>4= Mud<br>99= Others (specify)<br>..... | 1= Mud<br>2= Cemented<br>3= Semi-cemented<br>99= Others (specify)<br>..... | 1= Jhupri<br>2= Not Jhupri<br>(If there is a permanent structure then it should not be considered as a Jhupri) |

\* If more than one room present then most expensive and good conditioned room should be selected for collecting information.

#### D. Perceived HH Economic Status:

|                                                                                                                                      |                                                                                                                  |
|--------------------------------------------------------------------------------------------------------------------------------------|------------------------------------------------------------------------------------------------------------------|
| (1) What was the household's economic status you feel after observing last one year's income and expenditure from different sources? | All the year deficient.....1<br>Deficient sometimes .....2<br>Not deficient nor surplus .....3<br>Surplus .....4 |
| (2) What kind of economic changes occurred during last one year?                                                                     | Condition improved .....1<br>Not improved.....2<br>Condition deteriorated .....3                                 |

**Health and hygiene awareness/practices:**

**E. Self-perception of health**

|    |                                                                                      |                                                            |
|----|--------------------------------------------------------------------------------------|------------------------------------------------------------|
| 1. | What do you think about your health status at present?                               | 1= Better; 2= Average; 3= Worse                            |
| 2. | What do you think about your health status at present in compare with previous year? | 1= Better than last year; 2= same; 3= Worse than last year |

**F. General awareness on health and health services:**

|    |                                                                                                           |                                                                                                                                                                                                                                                    |
|----|-----------------------------------------------------------------------------------------------------------|----------------------------------------------------------------------------------------------------------------------------------------------------------------------------------------------------------------------------------------------------|
| 1. | What should we do to maintain good health?<br>(More than one answer acceptable)                           | 1= Taking nutritious food regularly; 2= Taking bath regularly; 3= Cutting nails regularly; 4= Regular light exercise (eg. Swimming); 5= Keeping clean; 6= All of the above; 88 = Don't know; 99= Others (specify)<br>.....                         |
| 2. | Do you know about sanitary latrine?                                                                       | 1= Yes, 2= No                                                                                                                                                                                                                                      |
| 3. | What kind of problems may happen if you don't have a sanitary latrine (More than one answer acceptable)   | 1= Abdominal sickness, 2= Itching, 3= Others (specify)<br>.....                                                                                                                                                                                    |
| 4. | What are the rules for using sanitary latrine?                                                            | 1= To wear a sandal; 2=Water pot should be kept on right hand; 3=After defecation washing hand with ash and soap; 4= Every age group should use sanitary latrine; 5= It should be cleaned always<br><br>How many answers has given correctly?..... |
| 5. | What kind of latrine do you use?                                                                          | 1=Here and there; 2= Open hole; 3= Canal/river-ponds; 4=Pit; 5= Ring slab; 6= Sanitary ; Others (specify)<br>.....                                                                                                                                 |
| 6. | How does water polluted?<br>(Don't prompt; more than one answer acceptable)                               | 1= contact with dirty hands, 2= Contact with dirty and garbage, 3=If lid absent, 9= don't know, 99= Others (specify) .....                                                                                                                         |
| 7. | What kinds of diseases are transmitted by polluted water? (Don't prompt; more than one answer acceptable) | 1= diarrhea/loose motion; 2= Dysentery; 3= Bloody Dysentery; 4= Indigestion; 5= Worms; 6= Jaundice; 7= Typhoid; 8= Cholera; 10= Arsenicosis; 88= Nothing happen, don't know; Others (specify)<br>.....                                             |
| 8. | How can we purify water?<br>(Don't prompt; more than one answer acceptable)                               | 1= Boiling ;2= Medicine; 3= Filtering; 88= don't know<br>Others (specify) .....                                                                                                                                                                    |

|     |                                                                                                             |                                                                                                                                                                                                                                                                                                                                            |
|-----|-------------------------------------------------------------------------------------------------------------|--------------------------------------------------------------------------------------------------------------------------------------------------------------------------------------------------------------------------------------------------------------------------------------------------------------------------------------------|
| 9.  | What do you do with the domestic garbage that accumulate each day?                                          | 1= Certain place (within or outside of the yard);<br>2=Anywhere; 88= Not applicable, 99= Others (specify)<br>.....                                                                                                                                                                                                                         |
| 10. | Do you know, if you are sick where you can get treatment in your area?<br>(More than one answer acceptable) | 1= Nurse/ Other field level health worker;2=Health and Family welfare center; 3=Upazila health complex; 4= Medical college hospital; 5= District hospital; 6=BRAC health center; 7= Private clinic/ health center; 8= Pharmacy/drug store; 9 MBBS doctor; 10=Kabiraj/Village doctor; 11= Homeopath; 88= Don't know; Others (specify) ..... |
| 11. | If you know, how did you get this information?<br>(More than one answer acceptable)                         | 1= BRAC worker; 2=Knew earlier; 3= Other health worker; 4= Neighbour/friends; 5= Relatives; 6= Radio/TV/Newspaper/Leaflet/ Advertisement at local bazaar; Others (specify) .....                                                                                                                                                           |

**Thank you for your time and cooperation.**
